# Supplementary material for: Anticonvulsant and anesthetic effects of a fluorescent neurosteroid analog activated by visible light
Source: Springer Nature journal article supplement (doi:10.1038/nn1862), 2007-02-25
Supplement: nn1862-S2.pdf [file nn1862-S2.pdf]

**Supplementary Table 1.**

| Configuration | Photoactivated | Bath     | Duration OT1 | Fraction OT1 | Duration OT2 | Fraction OT2 | Duration OT3 | Fraction OT3 | n  |
|---------------|----------------|----------|--------------|--------------|--------------|--------------|--------------|--------------|----|
| cell-attached | -              | -        | 0.28±0.08    | 0.35±0.14    | 2.7±0.9      | 0.42±0.10    | 10.4±4.0     | 0.23±0.12    | 14 |
| cell-attached | +              | -        | 0.49±0.12    | 0.30±0.08    | 7.4±4.6      | 0.44±0.17    | 29.3±22.3    | 0.26±0.17    | 11 |
| inside-out    | +              | -        | 0.38±0.12    | 0.30±0.12    | 5.5±2.9      | 0.37±0.11    | 19.8±8.0     | 0.33±0.17    | 8  |
| inside-out    | +              | 5 mM CDX | 0.60±0.01    | 0.38±0.11    | 10.0±7.7     | 0.42±0.06    | 56.7±32.8    | 0.20±0.06    | 3  |
|               |                |          |              |              |              |              |              |              |    |
| Configuration | Photoactivated | Bath     | Duration CT1 | Fraction CT1 | Duration CT2 | Fraction CT2 | Duration CT3 | Fraction CT3 | n  |
| cell-attached | -              | -        | 0.20±0.05    | 0.51±0.11    | 2.1±1.0      | 0.25±0.11    | 10.4±3.9     | 0.26±0.06    | 14 |
| cell-attached | +              | -        | 0.19±0.05    | 0.67±0.12    | 1.9±1.1      | 0.25±0.08    | 15.0±8.4     | 0.08±0.06    | 11 |
| inside-out    | +              | -        | 0.23±0.04    | 0.58±0.10    | 1.9±1.0      | 0.34±0.09    | 15.7±4.8     | 0.08±0.02    | 8  |
| inside-out    | +              | 5 mM CDX | 0.19±0.01    | 0.72±0.10    | 2.2±0.7      | 0.23±0.10    | 20.7±4.4     | 0.05±0.01    | 3  |

**Supplementary Table 1.** The results of the analysis of open and closed duration histograms from data obtained under various experimental conditions. The columns in the Table list, respectively, the configuration of the recording, whether the recording was carried out before (-) or after (+) photoactivation, the presence or absence of modulators (CDX) in the bath, the mean durations (in ms) and fractions of the three open or closed time components, and the number of recordings in given conditions. Photoactivation of C2-NBD 3 $\alpha$ 5 $\alpha$ P tended to increase the mean duration of the OT2 and OT3 components, and to reduce the fraction of CT3. These findings suggest that photoactivated C2-NBD 3 $\alpha$ 5 $\alpha$ P acts similarly to untreated neuroactive steroids. CDX is methyl- $\beta$ -cyclodextrin.
